# Supplementary material for: Development and implementation of a TaqMan triplex real-time PCR assay for concurrent detection of pseudorabies virus, porcine teschovirus 1, and Streptococcus suis 2
Source: Front Vet Sci. 2025 Jun 18;12:1589175. doi: 10.3389/fvets.2025.1589175 (PMC12213347; doi:10.3389/fvets.2025.1589175)
Supplement: Supplementary file 1 [file Table_1.xlsx]

## Sheet: Sheet1
							Table S1 The detection results of 30 nervous samples using the commercial singleplex real-time PCR detection kit and the mutiplex real-time PCR assay in this study
	Sample	Multiplex Real-Time PCR Assay			Commercial Singleplex Real-Time PCR Detection Kit
		PRV	PTV1	SS2	PRV	PTV1	SS2
	1	+	-	-	+	-	-
	2	-	+	-	-	+	-
	3	-	+	-	-	+	-
	4	+	+	-	+	+	-
	5	-	+	-	-	+	-
	6	-	+	-	-	+	-
	7	-	+	-	-	+	-
	8	+	+	-	+	+	-
	9	+	+	-	+	+	-
	10	+	+	-	+	+	-
	11	-	+	-	-	+	-
	12	-	+	-	-	+	-
	13	-	+	+	-	+	+
	14	+	+	+	+	+	+
	15	+	+	+	+	+	+
	16	-	-	+	-	-	+
	17	+	-	+	+	-	+
	18	+	-	+	+	-	+
	19	+	-	+	+	-	+
	20	-	-	+	-	-	+
	21	+	-	+	+	-	+
	22	+	-	-	+	-	-
	23	+	-	-	+	-	-
	24	+	-	-	+	-	-
	25	-	+	-	-	+	-
	26	+	+	+	+	+	+
	27	-	+	+	-	+	+
	28	+	+	-	+	+	-
	29	+	+	+	+	+	+
	30	-	+	-	-	+	-
